# Supplementary material for: Prevalence and associated harm of engagement in self-asphyxial behaviours (‘choking game’) in young people: a systematic review
Source: PubMed Central journal article supplement (PMC4680200; doi:10.1136/archdischild-2015-308187), 2015-06-25
Supplement: archdischild-2015-308187-s1.pdf [file archdischild-2015-308187-s1.pdf]

## Supplementary File A. MEDLINE search strategy

|    |                           |
|----|---------------------------|
| 1  | Asphyxia/                 |
| 2  | asphyxi*.tw               |
| 3  | Airway obstruction/       |
| 4  | Airway* adj4 obstruct*.tw |
| 5  | Brain Ischemia/           |
| 6  | Brain ischemia.tw         |
| 7  | exp Hypoxia, Brain/       |
| 8  | Choking.tw                |
| 9  | hypoxi*.tw                |
| 10 | suffocat*.tw              |
| 11 | strangulat*.tw            |
| 12 | *Anoxia/                  |
| 13 | Anoxi*.tw                 |
| 14 | throttI*.tw               |
| 15 | Hypocapnia/               |
| 16 | hypocapni*.tw             |
| 17 | Hyperventilation/         |
| 18 | hyperventilat*.tw         |
| 19 | syncop*.tw                |
| 20 | Breath holding/           |
| 21 | (breath adj2 hold*).tw.   |
| 22 | (breath adj control).tw   |
| 23 | (near adj hanging).tw     |
| 24 | <b>Or/ 1-23</b>           |
| 25 | choking game.af           |
| 26 | fainting lark.af          |
| 27 | mess trick.af             |
| 28 | fainting game.af          |
| 29 | riding a rocket.af        |
| 30 | airplaning.af             |
| 31 | American dream* game.af   |
| 32 | Black out game.af         |
| 33 | blackout game.af          |
| 34 | bum rushing.af            |
| 35 | california choke.af       |
| 36 | California dreaming.af    |
| 37 | California headrush.af    |
| 38 | California high.af        |
| 39 | california knockout.af    |
| 40 | chok* out.af              |
| 41 | cloud nine.af             |
| 42 | cloud 9.af                |
| 43 | dumbass game.af           |
| 44 | dying game.af             |
| 45 | flatlin* game.af          |
| 46 | funky chicken.af          |
| 47 | Harvey wallbanger.af      |
| 48 | hyperventilation game.af  |
| 49 | Indian headrush.af        |
| 50 | knockout game.af          |
| 51 | knock out game.af         |
| 52 | pass out game.af          |
| 53 | passout game.af           |
| 54 | sleeper hold.af           |
| 55 | space cowboy.af           |
| 56 | space monkey.af           |
| 57 | suffocation game.af       |
| 58 | suffocation roulette.af   |
| 59 | high riser.af             |
| 60 | trip to heaven.af         |
| 61 | rocket ride.af            |
| 62 | speed dreaming.af         |
| 63 | wall hit.af               |
| 64 | purple dragon.af          |
| 65 | five second high.af       |
| 66 | 5 minutes of heaven.af    |

|     |                                |
|-----|--------------------------------|
| 67  | seven minutes til heaven.af    |
| 68  | acupuncture game.af            |
| 69  | sleeping game.af               |
| 70  | tap out.af                     |
| 71  | tingling game.af               |
| 72  | twitching game.af              |
| 73  | take me down.af                |
| 74  | les jeux de non-oxygenation.af |
| 75  | reve indien.af                 |
| 76  | reve bleu.af                   |
| 77  | jeu du foulard.af              |
| 78  | navette spatiale.af            |
| 79  | 30 secondes de Bonheur.af      |
| 80  | jeu de la grenouille.af        |
| 81  | jeu du cosmos.af               |
| 82  | jeu du poumon.af               |
| 83  | jeu du coma.af                 |
| 84  | jeu de la serviette.af         |
| 85  | jeu de la tomate.af            |
| 86  | jeux dangereux.af              |
| 87  | evanouissement.af              |
| 88  | intent desmayo.af              |
| 89  | juego de la asfixia.af         |
| 90  | Tomatenspiel.af                |
| 91  | Ohnmachtspiel.af               |
| 92  | Wuergespiel.af                 |
| 93  | Ohnmaechterlis.af              |
| 94  | Halstuchspiel.af               |
| 95  | Bio-Kiffen.af                  |
| 96  | Pilotentest.af                 |
| 97  | <b>Or/ 25-96</b>               |
| 98  | risk taking/                   |
| 99  | risk tak*.tw                   |
| 100 | risktak*.tw                    |
| 101 | risk* behavio?r.tw             |
| 102 | recreation/                    |
| 103 | recreation.tw                  |
| 104 | accidents/                     |
| 105 | accident*.tw                   |
| 106 | Games, experimental/           |
| 107 | game*.tw                       |
| 108 | self-injurious behavior/       |
| 109 | Self-injur*.tw                 |
| 110 | self inflicted.tw              |
| 111 | "play and playthings"/         |
| 112 | <b>Or/ 98-111</b>              |
| 113 | Infant/                        |
| 114 | Infan*.tw                      |
| 115 | child/                         |
| 116 | child, Preschool/              |
| 117 | child*.tw                      |
| 118 | Adolescent/                    |
| 119 | adolesc*.tw                    |
| 120 | preadolesc*.tw                 |
| 121 | pre-adolesc*.tw                |
| 122 | Young adult/                   |
| 123 | young adult.tw                 |
| 124 | teen*.tw                       |
| 125 | teenager*.tw                   |
| 126 | sibling*.tw                    |
| 127 | early life.tw                  |
| 128 | Youth/                         |
| 129 | young*.tw                      |
| 130 | youth*.tw                      |
| 131 | boy*.tw                        |
| 132 | girl*.tw                       |
| 133 | Juvenile*.tw                   |
| 134 | minors/                        |
| 135 | minor*.tw                      |
| 136 | Pe?diatri*.tw                  |
| 137 | pubert*.tw                     |

|     |                           |
|-----|---------------------------|
| 138 | pubescen*.tw              |
| 139 | pre-pubescen*.tw          |
| 140 | prepubescen*.tw           |
| 141 | prepube*.tw               |
| 142 | pre-pube*.tw              |
| 143 | puberty.tw                |
| 144 | school*.tw                |
| 145 | Primary school.tw         |
| 146 | Elementary school.tw      |
| 147 | Secondary school.tw       |
| 148 | high school.tw            |
| 149 | highschool.tw             |
| 150 | pre-school*.tw            |
| 151 | preschool*.tw             |
| 152 | schoolchild*.tw           |
| 153 | school child*.tw          |
| 154 | Students/                 |
| 155 | student*.tw               |
| 156 | undergrad*.tw             |
| 157 | college.tw                |
| 158 | campus*.tw                |
| 159 | classroom*.tw             |
| 160 | <b>Or/114-159</b>         |
| 161 | <b>24 and 112 and 160</b> |
| 162 | <b>161 or 97</b>          |
