# Supplementary material for: Prevalence and associated harm of engagement in self-asphyxial behaviours (‘choking game’) in young people: a systematic review
Source: PubMed Central journal article supplement (PMC4680200; doi:10.1136/archdischild-2015-308187), 2015-06-25
Supplement: archdischild-2015-308187-s2.pdf [file archdischild-2015-308187-s2.pdf]

## Supplementary File B. Overview of included studies.

| Type of study                         | Country<br>(Language of publication)                        | Author, Year                                                                           | Type of publication                                                                                                                                                                                                                                                                                                                                                                                                                                                                           |
|---------------------------------------|-------------------------------------------------------------|----------------------------------------------------------------------------------------|-----------------------------------------------------------------------------------------------------------------------------------------------------------------------------------------------------------------------------------------------------------------------------------------------------------------------------------------------------------------------------------------------------------------------------------------------------------------------------------------------|
| Systematic Review                     | France (French)                                             | Ernoult A, et al, 2012[17]                                                             | Journal publication [published]                                                                                                                                                                                                                                                                                                                                                                                                                                                               |
| Content analysis                      | Canada (English)                                            | Linkletter M, et al, 2009[12]                                                          | Journal publication [published]                                                                                                                                                                                                                                                                                                                                                                                                                                                               |
| Case series                           | Australia (English)                                         | Byard RW, et al, 2011[59]                                                              | Journal publication [published]                                                                                                                                                                                                                                                                                                                                                                                                                                                               |
|                                       | Canada (English)                                            | Le D, et al, 2001[9]                                                                   | Journal publication [published]                                                                                                                                                                                                                                                                                                                                                                                                                                                               |
|                                       | Canada (English)                                            | McFaul SR, 2007[64]                                                                    | Conference presentation [unpublished data, abstract available online: McFaul SR. Injuries associated with playing asphyxiation games among children and youth. The Canadian Hospitals Injury Reporting and Prevention Program (CHIRPP) 1990-2005. 2007 Canadian Injury Prevention and Safety Promotion Conference, November 2007, Toronto, Ontario. Abstract # 34 <a href="http://207.35.157.99/natconf/Poster_Abstacts_2007.pdf">http://207.35.157.99/natconf/Poster_Abstacts_2007.pdf</a> ] |
|                                       | Norway (English)                                            | Freuchen A, et al, 2014[61]                                                            | Journal publication [published]                                                                                                                                                                                                                                                                                                                                                                                                                                                               |
|                                       | UK (English)                                                | Rumball A, 1963[15]                                                                    | Journal publication [published]                                                                                                                                                                                                                                                                                                                                                                                                                                                               |
|                                       | US (English)                                                | Andrew TA, et al, 2007[55]                                                             | Journal publication [published]                                                                                                                                                                                                                                                                                                                                                                                                                                                               |
|                                       | US (English)                                                | Toblin RL, et al, 2008[8]                                                              | Journal publication [published]                                                                                                                                                                                                                                                                                                                                                                                                                                                               |
|                                       | Argentina (Spanish)                                         | Baquero F et al, 2011[57]                                                              | Journal publication [published]                                                                                                                                                                                                                                                                                                                                                                                                                                                               |
|                                       | Case reports                                                | Colombia (English)                                                                     | Senanayake MP, et al, 2006[21]                                                                                                                                                                                                                                                                                                                                                                                                                                                                |
| France (French)                       |                                                             | Gicquel JJ, et al, 2004[62]                                                            | Journal publication [published]                                                                                                                                                                                                                                                                                                                                                                                                                                                               |
| Israel (English)                      |                                                             | Shlamovitz GZ, et al, 2003[22]                                                         | Journal publication [published]                                                                                                                                                                                                                                                                                                                                                                                                                                                               |
| Spain (Spanish)                       |                                                             | Barberia-Marcain E et al, 2010[11]                                                     | Journal publication [published]                                                                                                                                                                                                                                                                                                                                                                                                                                                               |
| Spain (Spanish)                       |                                                             | Klamburg Pujol J, et al, 2011[63]                                                      | Journal publication [published]                                                                                                                                                                                                                                                                                                                                                                                                                                                               |
| Tunisia (French)                      |                                                             | Ayadi A, et al, 2009[56]                                                               | Journal publication [published]                                                                                                                                                                                                                                                                                                                                                                                                                                                               |
| US (English)                          |                                                             | Barrett DW, 1999[58]                                                                   | Journal publication [published]                                                                                                                                                                                                                                                                                                                                                                                                                                                               |
| US (English)                          |                                                             | Egge MK, et al, 2010[60]                                                               | Journal publication [published]                                                                                                                                                                                                                                                                                                                                                                                                                                                               |
| US (English)                          |                                                             | Ullrich NJ, et al, 2008[37]                                                            | Journal publication [published]                                                                                                                                                                                                                                                                                                                                                                                                                                                               |
| Cross-sectional study                 | Canada (English)                                            | Centre for Addiction and Mental Health, 2008[27]                                       | Ebulletin [published]                                                                                                                                                                                                                                                                                                                                                                                                                                                                         |
|                                       | Canada (English)                                            | Centre for Addiction and Mental Health, 2010[36]                                       | Ebulletin [published]                                                                                                                                                                                                                                                                                                                                                                                                                                                                         |
|                                       | Canada (English)                                            | Macnab AJ, et al, 2008[30]                                                             | Journal publication [published]                                                                                                                                                                                                                                                                                                                                                                                                                                                               |
|                                       | Colombia (Spanish)                                          | Diaz Jimenez E, et al, 2014[48]                                                        | Journal publication [published]                                                                                                                                                                                                                                                                                                                                                                                                                                                               |
|                                       | France (French)                                             | Bernadet S, et al, 2012[46]                                                            | Journal publication [published]                                                                                                                                                                                                                                                                                                                                                                                                                                                               |
|                                       | France (French)                                             | Bonnelye G, 2007[45]                                                                   | Conference presentation [available online at: <a href="http://asssm33.free.fr/Doc/Urgences/Jeux_dangereux_s_colaires.pdf">http://asssm33.free.fr/Doc/Urgences/Jeux_dangereux_s_colaires.pdf</a> ]                                                                                                                                                                                                                                                                                             |
|                                       | France (French)                                             | IPSOS, 2012[50]                                                                        | Conference presentation [available online at: <a href="http://www.ipsos.fr/sites/default/files/attachments/connaissance_et_pratique_du_jeu_du_foulard.pdf">http://www.ipsos.fr/sites/default/files/attachments/connaissance_et_pratique_du_jeu_du_foulard.pdf</a> ]                                                                                                                                                                                                                           |
|                                       | US (English)                                                | Dake JA, et al, 2010[29]                                                               | Journal publication [published]                                                                                                                                                                                                                                                                                                                                                                                                                                                               |
|                                       | US (English)                                                | Brausch AM, et al, 2011[3]                                                             | Journal publication [published]                                                                                                                                                                                                                                                                                                                                                                                                                                                               |
|                                       | US (English)                                                | Centers for Disease Control and Prevention, 2010[36]                                   | Organisational report [published]                                                                                                                                                                                                                                                                                                                                                                                                                                                             |
|                                       | US (English)                                                | Hillard G et al, 2012[49]                                                              | Organisational report [published]                                                                                                                                                                                                                                                                                                                                                                                                                                                             |
|                                       | US (English)                                                | Maine Department of Health and Human Services and Maine Department of Health, 2012[51] | Organisational report [published]                                                                                                                                                                                                                                                                                                                                                                                                                                                             |
|                                       | US (English)                                                | Oregon Health Authority, 2014[52]                                                      | Organisational report [published]                                                                                                                                                                                                                                                                                                                                                                                                                                                             |
|                                       | US (English)                                                | Ramowski SK, et al, 2012[28]                                                           | Journal publication [published]                                                                                                                                                                                                                                                                                                                                                                                                                                                               |
| US (English)                          | Williams County Family and Children First Council, 2007[53] | Organisational report [published]                                                      |                                                                                                                                                                                                                                                                                                                                                                                                                                                                                               |
| US (English)                          | Williams County Family and Children First Council, 2010[54] | Organisational report [published]                                                      |                                                                                                                                                                                                                                                                                                                                                                                                                                                                                               |
| Cross-sectional and case report study | France (French)                                             | Besnard E, et al, 2012[44]                                                             | Students' Dissertation [available online at: <a href="http://www.jeudufoulard.com/html-fr/fram_01.html">http://www.jeudufoulard.com/html-fr/fram_01.html</a> ]                                                                                                                                                                                                                                                                                                                                |
