# Supplementary material for: Prevalence and associated harm of engagement in self-asphyxial behaviours (‘choking game’) in young people: a systematic review
Source: PubMed Central journal article supplement (PMC4680200; doi:10.1136/archdischild-2015-308187), 2015-06-25
Supplement: archdischild-2015-308187-s3.pdf [file archdischild-2015-308187-s3.pdf]

## Supplementary File C. Settings and motivation/intent of engagement in SAB

|                                          | <b>Settings</b>                                                                                                                                                                                                                                                                                                                                         | <b>Motivation/Intention mentioned by young people in Sample</b>                                                                                                                                                                                                                                                                         |
|------------------------------------------|---------------------------------------------------------------------------------------------------------------------------------------------------------------------------------------------------------------------------------------------------------------------------------------------------------------------------------------------------------|-----------------------------------------------------------------------------------------------------------------------------------------------------------------------------------------------------------------------------------------------------------------------------------------------------------------------------------------|
| Besnard E, <i>et al</i> , 2012[44]*      | "As regards to the context of this practice, in general they played it at home, at friends' houses or at school."                                                                                                                                                                                                                                       | <ul style="list-style-type: none"> <li>• Entertainment (61.53%)</li> <li>• Curiosity (7.69%)</li> <li>• Depression (15.38%)</li> <li>• No response (15%)</li> </ul>                                                                                                                                                                     |
| Bonnelye G, 2007[45]* †                  | <ul style="list-style-type: none"> <li>• At school, in the playground (73%)</li> <li>• In their neighbourhood (46%)</li> <li>• At an outdoor facility (19%)</li> <li>• At a friend's house (17%)</li> <li>• At home (16%)</li> <li>• On summer camp (14%)</li> <li>• On holiday with cousins or friends (10%)</li> <li>• Don't know (13%)</li> </ul>    | <ul style="list-style-type: none"> <li>• "Everyone plays them/I want to do what my friends are doing" (59%)</li> <li>• "It's fun" (46%)</li> <li>• "To prove my strength" (13%)</li> <li>• "To show I'm not scared" (8%)</li> <li>• "I felt forced to do it" (7%)</li> </ul>                                                            |
| Diaz Jimenez E, <i>et al</i> , 2014[48]* | <ul style="list-style-type: none"> <li>• Friend's house (50%)</li> <li>• School (27%)</li> </ul>                                                                                                                                                                                                                                                        | <ul style="list-style-type: none"> <li>• Curiosity (55%)</li> <li>• Experimentation (2%)</li> <li>• Peer pressure (30%)</li> </ul>                                                                                                                                                                                                      |
| IPSOS, 2012[50]*                         | <ul style="list-style-type: none"> <li>• In the playground (82%)</li> <li>• In the canteen (15%)</li> <li>• At school (86%)</li> <li>• At own house (10%)</li> <li>• In an outdoor place/on summer camp (7%)</li> <li>• At sports club (6%)</li> <li>• At boarding school (1%)</li> <li>• Somewhere else (10%)</li> <li>• Could not say (1%)</li> </ul> | <ul style="list-style-type: none"> <li>• Because everyone/friends are playing it" (50%)</li> <li>• "It's a craze" (32%)</li> <li>• "Because it's a funny game and it gives me strange/weird feelings" (16%)</li> <li>• "To be part of my group of friends" (14%)</li> <li>• "To unwind" (9%)</li> <li>• "Could not say" (3%)</li> </ul> |

Notes: \*Based on translations of the foreign language studies. †Investigated engagement in dangerous games including SAB.
