# Supplementary material for: Prevalence and associated harm of engagement in self-asphyxial behaviours (‘choking game’) in young people: a systematic review
Source: PubMed Central journal article supplement (PMC4680200; doi:10.1136/archdischild-2015-308187), 2015-06-25
Supplement: archdischild-2015-308187-s5.pdf [file archdischild-2015-308187-s5.pdf]

## Supplementary File E. Case studies: detailed case descriptions

| Study details                                |             | Case descriptions                      |                                      |                                                                                                                                                                                               |       |
|----------------------------------------------|-------------|----------------------------------------|--------------------------------------|-----------------------------------------------------------------------------------------------------------------------------------------------------------------------------------------------|-------|
| Author, Year                                 | Age, Gender | Use of ligature                        | Setting                              | Background                                                                                                                                                                                    | Fatal |
| Andrew TA, <i>et al</i> , 2007[50]           | 9, M        | Yes (thin rope)                        | Alone, in bedroom                    | Female sibling described individual as playing with rope about his neck on this and on previous occasions.                                                                                    | Yes   |
|                                              | 13, M       | Yes (dog leash)                        | Alone, in basement of own home       | Mother wrote email afterwards alluding to the deceased's involvement with an asphyxial game known as "Space Monkey".                                                                          | Yes   |
|                                              | 11, M       | Yes (dog leash)                        | Alone, in bedroom                    | The deceased's intent, stated to sibling, was to increase the time in which he could remain conscious while playing.                                                                          | Yes   |
| Ayadi A, <i>et al</i> , 2009[51]*            | 11, M       | Yes (long scarf)                       | Alone, at home                       | Students in school engaged in SAB.                                                                                                                                                            | Yes   |
| Barberia-Marcalain E <i>et al</i> , 2010[9]* | 15, M       | Yes (noose tied to bunk bed)           | Alone, in bedroom                    | Brother revealed that he showed deceased how to lose consciousness.                                                                                                                           | Yes   |
| Barrett DW, 1999[53]                         | 12, F       | Yes (shoelaces)                        | In group, at party                   | At party, participants attempted to cause one another to lose consciousness.                                                                                                                  | No    |
| Besnard E, <i>et al</i> , 2012[39]*          | 14, F       | No                                     | In group, at park and friends' house | Introduced to SAB by older cousins.                                                                                                                                                           | No    |
| Egge MK, <i>et al</i> , 2010[55]             | 12, F       | Yes (hanging from bunk bed)            | Alone, in bedroom                    | Cousin revealed engaging in SAB with the deceased by pulling clothing tight around the neck to prevent oxygen flow.                                                                           | Yes   |
| Freuchen A, <i>et al</i> , 2014[56]          | M           | Yes (noose around neck)                | Alone, at home                       | NA                                                                                                                                                                                            | Yes   |
|                                              | M           | Yes (noose around neck)                | Alone, at home                       | NA                                                                                                                                                                                            | Yes   |
| Gicquel JJ, <i>et al</i> , 2004[57]*         | 12, M       | NA                                     | In school                            | Individual revealed engagement in SAB to physician.                                                                                                                                           | No    |
| Klamburg Pujol J, <i>et al</i> , 2011[58]*   | 19, M       | NA                                     | In group, at party                   | Friends revealed engagement in SAB to physician after incidence.                                                                                                                              | No    |
| Le D, <i>et al</i> , 2001[7]                 | 9, M        | Yes (cloth towel from towel dispenser) | In group, in school washroom         | NA                                                                                                                                                                                            | Yes   |
|                                              | 12, M       |                                        | Alone, in school washroom            | NA                                                                                                                                                                                            | No    |
|                                              | 7, M        |                                        | NA                                   | NA                                                                                                                                                                                            | Yes   |
|                                              | 7, M        |                                        | NA                                   | NA                                                                                                                                                                                            | Yes   |
|                                              | 11, M       |                                        | NA                                   | NA                                                                                                                                                                                            | Yes   |
| Rumball A, 1963[13]                          | 20, M       | No                                     | In group with friends                | Individual revealed engagement in SAB and wanted to improve on the usual performance by its repetition in quick succession and without interval.                                              | No    |
|                                              | 19, M       | No                                     | In group, lunchroom                  | Individual was "persuaded" by friends of similar age to engage in SAB for the first time.                                                                                                     | No    |
| Senanayake MP, <i>et al</i> , 2006[19]       | 10, M       | Yes (belt)                             | Alone, in bedroom                    | NA                                                                                                                                                                                            | No    |
| Shlamovitz GZ, <i>et al</i> , 2003[20]       | 12, M       | No                                     | In group with friends                | Individual reported at least 4 previous episodes and added that sometimes the game is played in a pair and that the "loser" is the one who passes out first.                                  | No    |
| Toblin RL, <i>et al</i> , 2008[6]            | 13, M       | Yes (belt)                             | Alone, in bedroom.                   | Young people engaged in SAB at local parties.                                                                                                                                                 | Yes   |
|                                              | 13, F       | Yes (belt and shoelace)                | Alone, in bedroom                    | Individual had confided in a cousin that she recently had played the "choking game" in the locker room at school and that a group of girls at her school had been suspended for playing this. | Yes   |
| Ullrich NJ, <i>et al</i> , 2008[34]          | 14, M       | No                                     | NA                                   | EEG-bedside monitoring showed how person place his hands on his neck to restrict the oxygen flow to the brain.                                                                                | No    |

Note: \*Based on translation of foreign language studies. NA: not available
