# Supplementary material for: Prevalence and associated harm of engagement in self-asphyxial behaviours (‘choking game’) in young people: a systematic review
Source: Arch Dis Child. 2015 Jun 25;100(12):1106–14. doi: 10.1136/archdischild-2015-308187 (PMC4680200; doi:10.1136/archdischild-2015-308187)
Supplement: Web supplement [file archdischild-2015-308187-s4.pdf]

## Supplementary File D. Engaging in SAB and risk factors

| Risk factor categories | Variables                                       | Evidence of association (and references)                                                                                                                                                                                                                                                                                                                                                    | Evidence of no association |
|------------------------|-------------------------------------------------|---------------------------------------------------------------------------------------------------------------------------------------------------------------------------------------------------------------------------------------------------------------------------------------------------------------------------------------------------------------------------------------------|----------------------------|
| Demographics           | Age                                             | • Being older [29 44]*                                                                                                                                                                                                                                                                                                                                                                      | [3 36]                     |
|                        | Gender                                          | • Being male [29] (high school students only)*                                                                                                                                                                                                                                                                                                                                              | [3 28 36]                  |
|                        | Ethnicity                                       | • American Indian/Alaska Native (vs. all others)[36]*<br>• Being of African American or Pacific Islander ethnicity (vs. white ethnicity) [28]*                                                                                                                                                                                                                                              |                            |
| Living situation       | Home situation                                  | • Not living with two parents [29]*                                                                                                                                                                                                                                                                                                                                                         | [44]                       |
|                        | Geographical location                           | • Living in rural location [36]*                                                                                                                                                                                                                                                                                                                                                            | [28]                       |
| Education              | School achievement                              | • Having repeated a school year [44]*<br>• Lower grades [28 29]*                                                                                                                                                                                                                                                                                                                            |                            |
| Health risk factors    | Substance Use                                   | • Substance use unspecified [3 36]*                                                                                                                                                                                                                                                                                                                                                         |                            |
|                        | <i>Alcohol use</i>                              | • Alcohol use [44] [28]*<br>• Binge drinking [29]*                                                                                                                                                                                                                                                                                                                                          |                            |
|                        | <i>Tobacco use</i>                              | • Tobacco use [44] [29] [28]*                                                                                                                                                                                                                                                                                                                                                               |                            |
|                        | <i>Cannabis and drug use</i>                    | • Cannabis use [44] [29] [28]*<br>• Other (illegal) drug use [44]*                                                                                                                                                                                                                                                                                                                          |                            |
|                        | <i>Inhalant/solvent use</i>                     | • Ever used medications without a prescription to get high [29]<br>• Ever used inhalants to get high [29] (high school only)*                                                                                                                                                                                                                                                               |                            |
|                        | Mental health                                   | • General mental health [36]*<br>• Higher levels of depression [44]<br>• Higher Disinhibition and “general feeling” scores [44]<br>• Engagement in suicidal behaviours [3]*<br>• Attempted suicide in past year [29]*<br>• Contemplated suicide [28]*<br>• Felt sad/hopeless for over two weeks in past year [29] [28]*<br>• Fair/poor mental health status/ unmet mental health need [28]* |                            |
|                        | Diet                                            | • Disordered eating [3]*<br>• Poor nutrition (food insecurity, low fruit/vegetable and breakfast consumption [28]*                                                                                                                                                                                                                                                                          |                            |
|                        | Sexual health behaviours                        | • Having ever been forced to have sexual intercourse [29]*<br>• Higher number of sexual partners [29]* (high school only)<br>• Ever had sexual intercourse [28]*                                                                                                                                                                                                                            |                            |
|                        | Physical Activity                               |                                                                                                                                                                                                                                                                                                                                                                                             | [28]                       |
|                        | Risk behaviours                                 | • Engagement in risky sports (e.g. roller-blading, boxing, and skateboarding) [44]*<br>• Engagement in risky motor vehicle use (e.g. speeding, riding without a helmet,...) [44]*                                                                                                                                                                                                           |                            |
|                        | Gambling                                        | • Ever gambled for money, gambling in past 30 days [28]*                                                                                                                                                                                                                                                                                                                                    |                            |
|                        | Physical health (accidents/hospital admissions) |                                                                                                                                                                                                                                                                                                                                                                                             | [28]                       |
|                        | Other behaviours                                | • Engagement in other unhealthy behaviours [36]                                                                                                                                                                                                                                                                                                                                             |                            |
| Exposure factors       | Exposure to violence/crime                      | • Experience of violence by others in past year [29]*<br>• Been threatened with a weapon [28]*<br>• Gun use in past 30 days [28]*<br>• Skipped school because felt unsafe [28]*                                                                                                                                                                                                             |                            |
| Personality traits     |                                                 | • Borderline, Impulsivity and Antisocial personality traits [44]<br>• Raised hyperactive / impulsive symptomatology [46]<br>• Strong “novelty seeking” [46]*<br>• Use of active coping strategies (seeking advice) in resolving conflict [46]                                                                                                                                               |                            |

Notes: Only cross-sectional studies that report on the variables are displayed in the table.

\*Statistical significant association between risk factor and SAB reported by study author(s) at  $p \leq 0.5$  level.
